# Supplementary material for: Terrestrial or marine – indications towards the origin of ice-nucleating particles during melt season in the European Arctic up to 83.7° N
Source: Copernicus journal article supplement (doi:10.5194/acp-21-11613-2021), 2021-08-04
Supplement: Supplementary file [file acp-21-11613-2021-supplement.pdf]

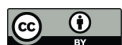

*Supplement of*

## **Terrestrial or marine – indications towards the origin of ice-nucleating particles during melt season in the European Arctic up to 83.7° N**

**Markus Hartmann et al.**

*Correspondence to:* Markus Hartmann ([markus.hartmann@tropos.de](mailto:markus.hartmann@tropos.de))

The copyright of individual parts of the supplement might differ from the article licence.

## S1 Meteorology during PS106

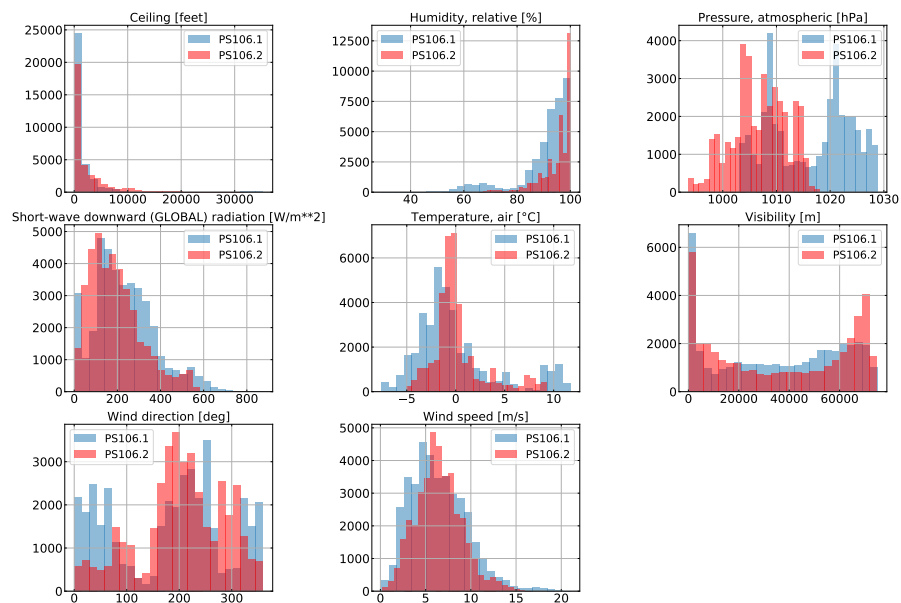

**Figure S1.** Frequency distributions of meteorological parameters measured during leg 1 (blue) and leg 2 (red) of PS106. Data from Schmithüsen (2018, 2019)

## S2 Filtered Seawater Samples

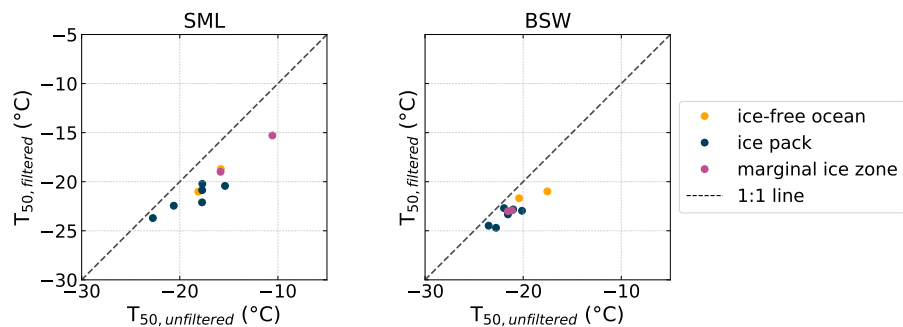

**Figure S2.** Comparison of filtered and unfiltered SML and BSW samples. Shown are the  $T_{50}$  values for corresponding samples. Symbols below the 1:1 line indicate that the filtered sample is less ice active.

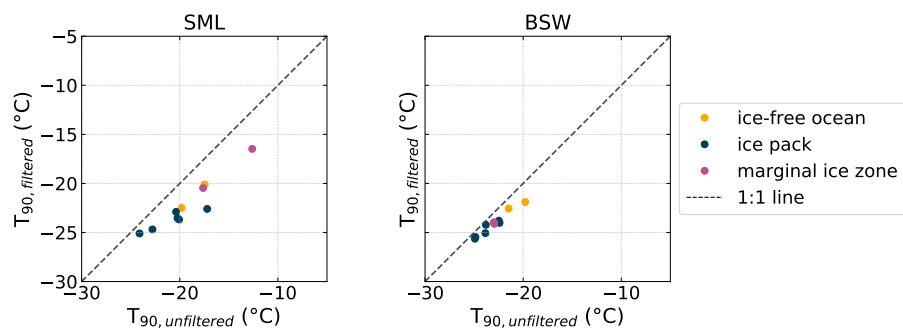

**Figure S3.** Comparison of filtered and unfiltered SML and BSW samples. Shown are the  $T_{90}$  values for corresponding samples. Symbols below the 1:1 line indicate that the filtered sample is less ice active.

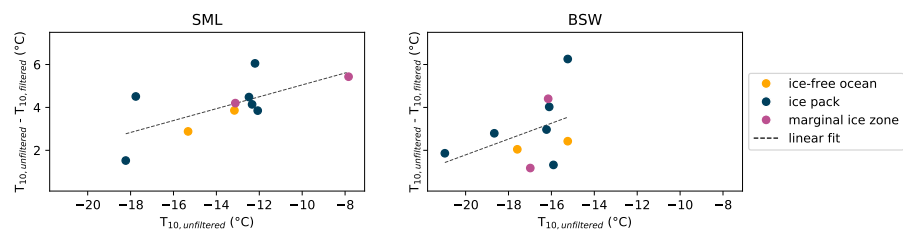

**Figure S4.** Difference in  $T_{10}$  of filtered and unfiltered sample plotted against  $T_{10}$  of the unfiltered sample for SML and BSW samples. The dashed line represents a linear fit.

### S3 Chlorophyll in the investigation region

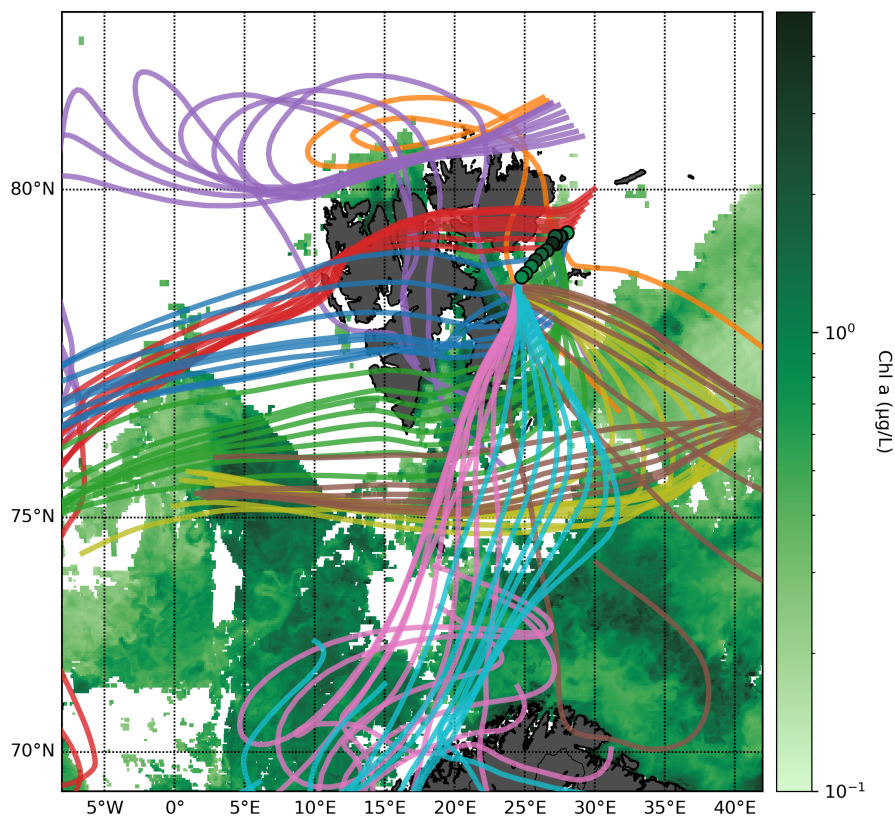

**Figure S5.** Map of chlorophyll-a measured by satellite and the Ferrybox system of the Polarstern, along with hourly backtrajectories. Dots east of Svalbard show the chlorophyll-a concentration measured by the Ferrybox system for the time period when the peak in chlorophyll-a concentration occurred (sampling period of LV194 and LV195). The chlorophyll-a concentration measured by satellite (Aqua MODIS, NPP, L3SMI, Global, 4km, Science Quality, 2003-present, 8 Day Composite (July 8 to July 16)) is shown as well. The hourly backtrajectories are identical to the Fig. 13 in the main manuscript.

Fig. S5 shows a map of chlorophyll-a measured by satellite and the Ferrybox system of the Polarstern, along with hourly backtrajectories. Dots show the chlorophyll-a concentration measured by the Ferrybox system for the time period when the peak in chlorophyll-a concentration occurred (sampling period of LV194 and LV195). The chlorophyll-a concentration measured by satellite (Aqua MODIS, NPP, L3SMI, Global, 4km, Science Quality, 2003-present, 8 Day Composite (July 8 to July 16)) is shown as well. The hourly backtrajectories are identical to the Fig. 13. It can be seen that several patches of higher chlorophyll-a concentration are present in region where our case study took place. Also several trajectories travel over the areas with increased chlorophyll-a concentration. This makes it possible that the corresponding air masses picked up particles emitted from those areas. However, it has to be kept in mind that backtrajectories also have spatial uncertainties and should be merely

seen as indicator for the areas where air masses came from and should not be used to pinpoint features with exact location. Therefore the Fig. S5 shall only elucidate that the air masses we investigate in this case study have the possibility to transport INPs from a local marine source to our measurement site, but it is not possible to further narrow down the most likely source

15 area.

## S4 Sample list of filter samples

Table S1: Information on the filter samples including sample ID, start and end date/time of sample collection, and the INP measurement related parameters  $V_{\text{drop}}$ ,  $V_{\text{wash}}$  and  $V_{\text{air}}$ .

| Sample ID | Start Date/Time     | End Date/Time       | $V_{\text{drop}}$ (m <sup>3</sup> ) | $V_{\text{wash}}$ (m <sup>3</sup> ) | $V_{\text{air}}$ (m <sup>3</sup> ) |
|-----------|---------------------|---------------------|-------------------------------------|-------------------------------------|------------------------------------|
| LV1       | 2017-05-24 18:44:05 | 2017-05-25 02:44:05 | 1.00E-09                            | 1.50E-06                            | 13.364                             |
| LV2       | 2017-05-25 02:44:05 | 2017-05-25 10:44:05 | 1.00E-09                            | 1.50E-06                            | 13.8766                            |
| LV3       | 2017-05-25 10:44:05 | 2017-05-25 18:44:05 | 2.00E-09                            | 1.00E-06                            | 13.7338                            |
| LV4       | 2017-05-25 18:44:06 | 2017-05-26 02:44:06 | 1.00E-09                            | 1.00E-06                            | 13.7241                            |
| LV5       | 2017-05-26 02:44:05 | 2017-05-26 10:44:05 | 1.00E-09                            | 1.00E-06                            | 13.0346                            |
| LV6       | 2017-05-26 10:44:05 | 2017-05-26 18:44:05 | 2.00E-09                            | 1.00E-06                            | 13.6037                            |
| LV7       | 2017-05-26 18:44:05 | 2017-05-27 02:44:05 | 1.00E-09                            | 1.00E-06                            | 12.7998                            |
| LV8       | 2017-05-27 02:44:05 | 2017-05-27 10:44:05 | 1.00E-09                            | 1.00E-06                            | 13.1622                            |
| LV9       | 2017-05-27 10:44:06 | 2017-05-27 18:44:06 | 2.00E-09                            | 1.00E-06                            | 13.4232                            |
| LV10      | 2017-05-27 18:44:05 | 2017-05-28 02:44:05 | 1.00E-09                            | 1.00E-06                            | 13.5014                            |
| LV11      | 2017-05-28 02:44:05 | 2017-05-28 10:44:05 | 1.00E-09                            | 1.00E-06                            | 13.7333                            |
| LV12      | 2017-05-28 10:44:05 | 2017-05-28 18:44:05 | 2.00E-09                            | 1.00E-06                            | 13.5444                            |
| LV13      | 2017-05-28 18:44:06 | 2017-05-29 02:44:06 | 1.00E-09                            | 3.00E-06                            | 13.665                             |
| LV14      | 2017-05-29 02:44:06 | 2017-05-29 10:44:06 | 1.00E-09                            | 1.00E-06                            | 13.5393                            |
| LV15      | 2017-05-29 10:44:06 | 2017-05-29 18:44:06 | 2.00E-09                            | 1.00E-06                            | 13.3834                            |
| LV17      | 2017-05-29 18:44:05 | 2017-05-30 02:44:05 | 1.00E-09                            | 3.00E-06                            | 13.6367                            |
| LV18      | 2017-05-30 02:44:06 | 2017-05-30 10:44:06 | 1.00E-09                            | 1.00E-06                            | 13.482                             |
| LV19      | 2017-05-30 10:44:06 | 2017-05-30 18:44:06 | 2.00E-09                            | 1.00E-06                            | 13.2745                            |
| LV20      | 2017-05-30 18:44:05 | 2017-05-31 02:44:05 | 1.00E-09                            | 3.00E-06                            | 13.4347                            |
| LV21      | 2017-05-31 02:44:06 | 2017-05-31 10:44:06 | 1.00E-09                            | 1.00E-06                            | 13.5989                            |
| LV22      | 2017-05-31 10:44:06 | 2017-05-31 18:44:06 | 2.00E-09                            | 1.00E-06                            | 13.402                             |
| LV23      | 2017-05-31 18:44:05 | 2017-06-01 02:44:05 | 1.00E-09                            | 6.00E-06                            | 13.4593                            |
| LV24      | 2017-06-01 02:44:06 | 2017-06-01 10:44:06 | 1.00E-09                            | 1.00E-06                            | 13.6141                            |
| LV25      | 2017-06-01 10:44:06 | 2017-06-01 18:44:06 | 2.00E-09                            | 1.00E-06                            | 13.2211                            |
| LV26      | 2017-06-01 18:44:05 | 2017-06-02 02:44:05 | 1.00E-09                            | 3.00E-06                            | 13.4625                            |
| LV27      | 2017-06-02 02:44:05 | 2017-06-02 10:44:05 | 1.00E-09                            | 1.00E-06                            | 13.2275                            |
| LV28      | 2017-06-02 10:44:05 | 2017-06-02 18:44:05 | 2.00E-09                            | 1.00E-06                            | 13.4415                            |
| LV29      | 2017-06-02 18:44:06 | 2017-06-03 02:44:06 | 1.00E-09                            | 3.00E-06                            | 13.1189                            |
| LV30      | 2017-06-03 02:44:05 | 2017-06-03 10:44:05 | 1.00E-09                            | 1.00E-06                            | 13.3567                            |

**Table S1 continued from previous page**

|      |                     |                     |          |          |         |
|------|---------------------|---------------------|----------|----------|---------|
| LV31 | 2017-06-03 10:44:06 | 2017-06-03 18:44:06 | 1.00E-09 | 1.00E-06 | 13.4868 |
| LV32 | 2017-06-03 18:44:05 | 2017-06-04 02:44:05 | 1.00E-09 | 3.00E-06 | 13.5722 |
| LV33 | 2017-06-04 02:44:05 | 2017-06-04 10:44:05 | 1.00E-09 | 1.00E-06 | 13.5453 |
| LV34 | 2017-06-04 10:44:05 | 2017-06-04 18:44:05 | 1.00E-09 | 1.00E-06 | 13.3867 |
| LV35 | 2017-06-04 18:44:06 | 2017-06-05 02:44:06 | 1.00E-09 | 3.00E-06 | 13.2561 |
| LV36 | 2017-06-05 02:44:06 | 2017-06-05 10:44:06 | 1.00E-09 | 3.00E-06 | 13.494  |
| LV37 | 2017-06-05 10:44:06 | 2017-06-05 18:44:06 | 1.00E-09 | 1.00E-06 | 13.3424 |
| LV38 | 2017-06-05 18:44:05 | 2017-06-06 02:44:05 | 1.00E-09 | 3.00E-06 | 13.571  |
| LV39 | 2017-06-06 02:44:05 | 2017-06-06 10:44:05 | 1.00E-09 | 3.00E-06 | 13.516  |
| LV40 | 2017-06-06 10:44:05 | 2017-06-06 18:44:05 | 1.00E-09 | 1.00E-06 | 13.5603 |
| LV41 | 2017-06-06 18:44:06 | 2017-06-06 20:44:06 | 1.00E-09 | 1.00E-06 | 3.3556  |
| LV42 | 2017-06-06 20:44:05 | 2017-06-06 22:44:05 | 1.00E-09 | 1.00E-06 | 3.3702  |
| LV43 | 2017-06-06 22:44:05 | 2017-06-07 00:44:05 | 1.00E-09 | 1.00E-06 | 3.3766  |
| LV44 | 2017-06-07 00:44:05 | 2017-06-07 02:44:05 | 1.00E-09 | 1.00E-06 | 3.2937  |
| LV45 | 2017-06-07 02:44:06 | 2017-06-07 04:44:06 | 1.00E-09 | 1.00E-06 | 3.3518  |
| LV46 | 2017-06-07 04:44:06 | 2017-06-07 06:44:06 | 1.00E-09 | 1.00E-06 | 3.3215  |
| LV47 | 2017-06-07 06:44:06 | 2017-06-07 08:44:06 | 1.00E-09 | 1.00E-06 | 3.3867  |
| LV48 | 2017-06-07 08:44:05 | 2017-06-07 10:44:05 | 1.00E-09 | 1.00E-06 | 3.3306  |
| LV49 | 2017-06-07 10:44:06 | 2017-06-07 12:44:06 | 1.00E-09 | 1.00E-06 | 3.265   |
| LV50 | 2017-06-07 12:44:06 | 2017-06-07 14:44:06 | 1.00E-09 | 1.00E-06 | 3.3574  |
| LV51 | 2017-06-07 14:44:05 | 2017-06-07 16:44:05 | 1.00E-09 | 1.00E-06 | 3.3382  |
| LV52 | 2017-06-07 16:44:06 | 2017-06-07 18:44:06 | 1.00E-09 | 1.00E-06 | 3.3593  |
| LV53 | 2017-06-07 18:44:06 | 2017-06-08 02:44:06 | 1.00E-09 | 1.00E-06 | 13.3844 |
| LV54 | 2017-06-08 02:44:05 | 2017-06-08 10:44:05 | 1.00E-09 | 3.00E-06 | 13.4333 |
| LV55 | 2017-06-08 10:44:05 | 2017-06-08 18:44:05 | 1.00E-09 | 1.00E-06 | 13.3914 |
| LV56 | 2017-06-08 18:44:05 | 2017-06-09 02:44:05 | 1.00E-09 | 3.00E-06 | 13.3852 |
| LV57 | 2017-06-09 02:44:06 | 2017-06-09 10:44:06 | 1.00E-09 | 3.00E-06 | 13.5345 |
| LV58 | 2017-06-09 10:44:05 | 2017-06-09 18:44:05 | 1.00E-09 | 1.00E-06 | 13.303  |
| LV59 | 2017-06-09 18:44:06 | 2017-06-10 02:44:06 | 1.00E-09 | 3.00E-06 | 13.2808 |
| LV60 | 2017-06-10 02:44:05 | 2017-06-10 10:44:05 | 1.00E-09 | 3.00E-06 | 13.336  |
| LV61 | 2017-06-10 10:44:05 | 2017-06-10 18:44:05 | 1.00E-09 | 1.00E-06 | 13.4814 |
| LV62 | 2017-06-10 18:44:05 | 2017-06-11 02:44:05 | 1.00E-09 | 3.00E-06 | 13.4903 |
| LV63 | 2017-06-11 02:44:05 | 2017-06-11 10:44:05 | 1.00E-09 | 3.00E-06 | 13.6937 |
| LV64 | 2017-06-11 10:44:05 | 2017-06-11 18:44:05 | 1.00E-09 | 1.00E-06 | 13.8514 |

**Table S1 continued from previous page**

|      |                     |                     |          |          |         |
|------|---------------------|---------------------|----------|----------|---------|
| LV65 | 2017-06-11 18:44:06 | 2017-06-12 02:44:06 | 1.00E-09 | 3.00E-06 | 13.7736 |
| LV66 | 2017-06-12 02:44:05 | 2017-06-12 10:44:05 | 1.00E-09 | 3.00E-06 | 13.4469 |
| LV67 | 2017-06-12 10:44:06 | 2017-06-12 18:44:06 | 1.00E-09 | 1.00E-06 | 13.6985 |
| LV68 | 2017-06-12 18:44:06 | 2017-06-13 02:44:06 | 1.00E-09 | 3.00E-06 | 13.6218 |
| LV69 | 2017-06-13 02:44:06 | 2017-06-13 10:44:06 | 1.00E-09 | 3.00E-06 | 13.9241 |
| LV70 | 2017-06-13 10:44:05 | 2017-06-13 18:44:05 | 1.00E-09 | 1.00E-06 | 13.7261 |
| LV71 | 2017-06-13 18:44:05 | 2017-06-14 02:44:05 | 1.00E-09 | 3.00E-06 | 13.4597 |
| LV72 | 2017-06-14 02:44:06 | 2017-06-14 10:44:06 | 1.00E-09 | 3.00E-06 | 13.4823 |
| LV73 | 2017-06-14 10:44:05 | 2017-06-14 18:44:05 | 1.00E-09 | 1.00E-06 | 13.3676 |
| LV74 | 2017-06-14 18:44:06 | 2017-06-15 02:44:06 | 1.00E-09 | 3.00E-06 | 13.315  |
| LV75 | 2017-06-15 02:44:05 | 2017-06-15 10:44:05 | 1.00E-09 | 3.00E-06 | 13.5743 |
| LV76 | 2017-06-15 10:44:06 | 2017-06-15 18:44:06 | 1.00E-09 | 1.00E-06 | 13.5022 |
| LV77 | 2017-06-15 18:44:06 | 2017-06-16 02:44:06 | 1.00E-09 | 3.00E-06 | 13.6143 |
| LV78 | 2017-06-16 02:44:05 | 2017-06-16 10:44:05 | 1.00E-09 | 3.00E-06 | 13.6673 |
| LV79 | 2017-06-16 10:44:05 | 2017-06-16 18:44:05 | 1.00E-09 | 1.00E-06 | 13.8151 |
| LV80 | 2017-06-16 18:44:06 | 2017-06-17 02:44:06 | 1.00E-09 | 3.00E-06 | 13.6382 |
| LV81 | 2017-06-17 02:44:05 | 2017-06-17 10:44:05 | 1.00E-09 | 3.00E-06 | 13.5365 |
| LV82 | 2017-06-17 10:44:05 | 2017-06-17 18:44:05 | 1.00E-09 | 1.00E-06 | 13.4833 |
| LV83 | 2017-06-17 18:44:05 | 2017-06-18 02:44:05 | 1.00E-09 | 3.00E-06 | 13.3616 |
| LV84 | 2017-06-18 02:44:05 | 2017-06-18 10:44:05 | 1.00E-09 | 3.00E-06 | 13.2425 |
| LV85 | 2017-06-18 10:44:06 | 2017-06-18 18:44:06 | 1.00E-09 | 1.00E-06 | 13.4102 |
| LV86 | 2017-06-18 18:44:06 | 2017-06-19 02:44:06 | 1.00E-09 | 3.00E-06 | 13.2994 |
| LV87 | 2017-06-19 02:44:05 | 2017-06-19 10:44:05 | 1.00E-09 | 3.00E-06 | 13.2843 |
| LV88 | 2017-06-19 10:44:05 | 2017-06-19 18:44:05 | 1.00E-09 | 1.00E-06 | 13.3801 |
| LV90 | 2017-06-20 02:44:05 | 2017-06-20 10:44:05 | 1.00E-09 | 3.00E-06 | 13.4782 |
| LV91 | 2017-06-20 10:44:05 | 2017-06-20 18:44:05 | 1.00E-09 | 1.00E-06 | 13.3972 |
| LV92 | 2017-06-20 18:44:06 | 2017-06-21 02:44:06 | 1.00E-09 | 3.00E-06 | 13.4854 |
| LV93 | 2017-06-21 02:44:05 | 2017-06-21 10:44:05 | 1.00E-09 | 3.00E-06 | 13.8507 |
| LV94 | 2017-06-21 10:44:06 | 2017-06-21 18:44:06 | 2.00E-09 | 1.00E-05 | 13.9159 |
| LV95 | 2017-06-21 18:44:06 | 2017-06-22 02:44:06 | 1.00E-09 | 3.00E-06 | 13.8086 |
| LV96 | 2017-06-22 02:44:05 | 2017-06-22 10:44:05 | 1.00E-09 | 3.00E-06 | 13.6727 |
| LV97 | 2017-06-22 10:44:05 | 2017-06-22 18:44:05 | 2.00E-09 | 1.00E-05 | 13.6527 |
| LV98 | 2017-06-22 18:44:06 | 2017-06-23 02:44:06 | 1.00E-09 | 3.00E-06 | 13.6263 |
| LV99 | 2017-06-23 02:44:06 | 2017-06-23 10:44:06 | 1.00E-09 | 3.00E-06 | 13.358  |



**Table S1 continued from previous page**

|       |                     |                     |          |          |         |
|-------|---------------------|---------------------|----------|----------|---------|
| LV100 | 2017-06-23 10:44:05 | 2017-06-23 18:44:05 | 2.00E-09 | 1.00E-05 | 13.4249 |
| LV101 | 2017-06-23 18:44:06 | 2017-06-24 02:44:06 | 1.00E-09 | 3.00E-06 | 13.4252 |
| LV102 | 2017-06-24 02:44:05 | 2017-06-24 10:44:05 | 1.00E-09 | 3.00E-06 | 13.4035 |
| LV103 | 2017-06-24 10:13:20 | 2017-06-24 18:13:20 | 2.00E-09 | 1.00E-05 | 12.5126 |
| LV104 | 2017-06-24 18:13:19 | 2017-06-24 20:13:19 | 1.00E-09 | 3.00E-06 | 3.3784  |
| LV105 | 2017-06-24 20:13:18 | 2017-06-24 22:13:18 | 1.00E-09 | 3.00E-06 | 3.3901  |
| LV106 | 2017-06-24 22:13:19 | 2017-06-25 00:13:19 | 1.00E-09 | 3.00E-06 | 3.3629  |
| LV107 | 2017-06-25 00:13:19 | 2017-06-25 02:13:19 | 1.00E-09 | 3.00E-06 | 3.3526  |
| LV108 | 2017-06-25 02:13:18 | 2017-06-25 04:13:18 | 1.00E-09 | 3.00E-06 | 3.3495  |
| LV109 | 2017-06-25 04:13:18 | 2017-06-25 06:13:18 | 1.00E-09 | 3.00E-06 | 3.3401  |
| LV110 | 2017-06-25 06:13:18 | 2017-06-25 08:13:18 | 1.00E-09 | 3.00E-06 | 3.3844  |
| LV111 | 2017-06-25 08:13:18 | 2017-06-25 10:13:18 | 1.00E-09 | 3.00E-06 | 3.3324  |
| LV112 | 2017-06-25 10:13:19 | 2017-06-25 12:13:19 | 1.00E-09 | 3.00E-06 | 3.3575  |
| LV113 | 2017-06-25 12:13:18 | 2017-06-25 14:13:18 | 1.00E-09 | 3.00E-06 | 3.3444  |
| LV114 | 2017-06-25 14:13:19 | 2017-06-25 16:13:19 | 1.00E-09 | 3.00E-06 | 3.3243  |
| LV115 | 2017-06-25 16:13:19 | 2017-06-25 18:13:19 | 1.00E-09 | 3.00E-06 | 3.3739  |
| LV116 | 2017-06-25 18:13:18 | 2017-06-26 02:13:18 | 1.00E-09 | 3.00E-06 | 13.4297 |
| LV117 | 2017-06-26 02:13:19 | 2017-06-26 10:13:19 | 1.00E-09 | 3.00E-06 | 13.3875 |
| LV118 | 2017-06-26 10:13:18 | 2017-06-26 18:13:18 | 1.00E-09 | 1.00E-05 | 13.4147 |
| LV119 | 2017-06-26 18:13:18 | 2017-06-27 02:13:18 | 1.00E-09 | 3.00E-06 | 13.3293 |
| LV120 | 2017-06-27 02:13:19 | 2017-06-27 10:13:19 | 1.00E-09 | 3.00E-06 | 13.512  |
| LV121 | 2017-06-27 10:13:19 | 2017-06-27 18:13:19 | 1.00E-09 | 1.00E-05 | 13.3159 |
| LV122 | 2017-06-27 18:13:18 | 2017-06-28 02:13:18 | 1.00E-09 | 3.00E-06 | 13.3833 |
| LV123 | 2017-06-28 02:13:18 | 2017-06-28 10:13:18 | 1.00E-09 | 3.00E-06 | 13.4953 |
| LV124 | 2017-06-28 10:13:18 | 2017-06-28 18:13:18 | 1.00E-09 | 1.00E-05 | 13.4132 |
| LV125 | 2017-06-28 18:13:18 | 2017-06-29 02:13:18 | 1.00E-09 | 3.00E-06 | 13.382  |
| LV126 | 2017-06-29 02:13:18 | 2017-06-29 10:13:18 | 1.00E-09 | 3.00E-06 | 13.4051 |
| LV127 | 2017-06-29 10:13:19 | 2017-06-29 18:13:19 | 1.00E-09 | 1.00E-05 | 13.425  |
| LV128 | 2017-06-29 18:13:19 | 2017-06-30 02:13:19 | 1.00E-09 | 3.00E-06 | 13.2653 |
| LV129 | 2017-06-30 02:13:18 | 2017-06-30 10:13:18 | 1.00E-09 | 3.00E-06 | 13.5042 |
| LV130 | 2017-06-30 10:13:19 | 2017-06-30 18:13:19 | 1.00E-09 | 1.00E-05 | 13.1151 |
| LV131 | 2017-06-30 18:13:19 | 2017-07-01 02:13:19 | 1.00E-09 | 3.00E-06 | 13.0522 |
| LV132 | 2017-07-01 02:13:19 | 2017-07-01 10:13:19 | 1.00E-09 | 3.00E-06 | 13.1088 |
| LV133 | 2017-07-01 10:13:19 | 2017-07-01 18:13:19 | 1.00E-09 | 1.00E-05 | 13.1199 |

**Table S1 continued from previous page**

|       |                     |                     |          |          |         |
|-------|---------------------|---------------------|----------|----------|---------|
| LV134 | 2017-07-01 18:13:18 | 2017-07-02 02:13:18 | 1.00E-09 | 3.00E-06 | 13.0771 |
| LV135 | 2017-07-02 02:13:19 | 2017-07-02 10:13:19 | 1.00E-09 | 3.00E-06 | 13.1196 |
| LV136 | 2017-07-02 10:13:19 | 2017-07-02 18:13:19 | 1.00E-09 | 1.00E-05 | 13.2351 |
| LV137 | 2017-07-02 18:13:19 | 2017-07-03 02:13:19 | 1.00E-09 | 3.00E-06 | 12.9632 |
| LV138 | 2017-07-03 02:13:18 | 2017-07-03 10:13:18 | 1.00E-09 | 3.00E-06 | 12.9771 |
| LV139 | 2017-07-03 10:13:18 | 2017-07-03 18:13:18 | 1.00E-09 | 1.00E-05 | 13.2915 |
| LV153 | 2017-07-05 02:13:19 | 2017-07-05 10:13:19 | 1.00E-09 | 3.00E-06 | 13.3439 |
| LV154 | 2017-07-05 10:13:19 | 2017-07-05 18:13:19 | 1.00E-09 | 1.00E-05 | 12.9859 |
| LV156 | 2017-07-06 02:13:19 | 2017-07-06 10:13:19 | 1.00E-09 | 3.00E-06 | 13.2444 |
| LV157 | 2017-07-06 10:13:19 | 2017-07-06 18:13:19 | 1.00E-09 | 1.00E-05 | 13.1926 |
| LV158 | 2017-07-06 18:13:18 | 2017-07-07 02:13:18 | 1.00E-09 | 3.00E-06 | 13.2601 |
| LV159 | 2017-07-07 02:13:18 | 2017-07-07 10:13:18 | 1.00E-09 | 3.00E-06 | 13.2437 |
| LV160 | 2017-07-07 10:13:18 | 2017-07-07 18:13:18 | 1.00E-09 | 1.00E-05 | 12.9855 |
| LV161 | 2017-07-07 18:13:18 | 2017-07-08 02:13:18 | 1.00E-09 | 3.00E-06 | 13.0379 |
| LV162 | 2017-07-08 02:13:18 | 2017-07-08 10:13:18 | 1.00E-09 | 3.00E-06 | 13.1561 |
| LV163 | 2017-07-08 10:13:18 | 2017-07-08 18:13:18 | 1.00E-09 | 1.00E-05 | 13.1462 |
| LV164 | 2017-07-08 18:13:19 | 2017-07-09 02:13:19 | 1.00E-09 | 3.00E-06 | 13.4222 |
| LV165 | 2017-07-09 02:13:18 | 2017-07-09 10:13:18 | 1.00E-09 | 3.00E-06 | 13.0372 |
| LV166 | 2017-07-09 10:13:19 | 2017-07-09 18:13:19 | 1.00E-09 | 1.00E-05 | 13.0227 |
| LV167 | 2017-07-09 18:13:19 | 2017-07-10 02:13:19 | 1.00E-09 | 3.00E-06 | 13.3225 |
| LV168 | 2017-07-10 02:13:19 | 2017-07-10 10:13:19 | 1.00E-09 | 3.00E-06 | 13.1759 |
| LV169 | 2017-07-10 10:13:18 | 2017-07-10 18:13:18 | 1.00E-09 | 6.00E-06 | 13.2474 |
| LV170 | 2017-07-10 18:13:18 | 2017-07-11 02:13:18 | 1.00E-09 | 3.00E-06 | 13.2873 |
| LV171 | 2017-07-11 02:13:18 | 2017-07-11 10:13:18 | 1.00E-09 | 3.00E-06 | 13.0063 |
| LV172 | 2017-07-11 10:13:18 | 2017-07-11 18:13:18 | 1.00E-09 | 6.00E-06 | 13.3026 |
| LV173 | 2017-07-11 18:13:18 | 2017-07-12 02:13:18 | 1.00E-09 | 3.00E-06 | 13.2725 |
| LV174 | 2017-07-12 02:13:19 | 2017-07-12 10:13:19 | 1.00E-09 | 3.00E-06 | 13.0801 |
| LV176 | 2017-07-12 10:13:18 | 2017-07-12 18:13:18 | 1.00E-09 | 6.00E-06 | 13.3052 |
| LV177 | 2017-07-12 18:13:18 | 2017-07-13 02:13:18 | 1.00E-09 | 3.00E-06 | 13.2656 |
| LV178 | 2017-07-13 02:13:18 | 2017-07-13 10:13:18 | 1.00E-09 | 3.00E-06 | 13.102  |
| LV179 | 2017-07-13 10:17:06 | 2017-07-13 12:17:06 | 1.00E-09 | 3.00E-06 | 3.3933  |
| LV180 | 2017-07-13 12:17:06 | 2017-07-13 14:17:06 | 1.00E-09 | 3.00E-06 | 3.2698  |
| LV181 | 2017-07-13 14:17:06 | 2017-07-13 16:17:06 | 1.00E-09 | 3.00E-06 | 3.2428  |
| LV182 | 2017-07-13 16:17:05 | 2017-07-13 18:17:05 | 1.00E-09 | 3.00E-06 | 3.3187  |

**Table S1 continued from previous page**

|       |                     |                     |          |          |         |
|-------|---------------------|---------------------|----------|----------|---------|
| LV183 | 2017-07-13 18:17:06 | 2017-07-13 20:17:06 | 1.00E-09 | 3.00E-06 | 3.2542  |
| LV184 | 2017-07-13 20:17:06 | 2017-07-13 22:17:06 | 1.00E-09 | 3.00E-06 | 3.2868  |
| LV185 | 2017-07-13 22:17:05 | 2017-07-14 00:17:05 | 1.00E-09 | 3.00E-06 | 3.3509  |
| LV186 | 2017-07-14 00:17:06 | 2017-07-14 02:17:06 | 1.00E-09 | 3.00E-06 | 3.354   |
| LV187 | 2017-07-14 02:17:05 | 2017-07-14 04:17:05 | 1.00E-09 | 3.00E-06 | 3.4633  |
| LV188 | 2017-07-14 04:17:06 | 2017-07-14 06:17:06 | 1.00E-09 | 3.00E-06 | 3.3949  |
| LV189 | 2017-07-14 06:17:06 | 2017-07-14 08:17:06 | 1.00E-09 | 3.00E-06 | 3.3921  |
| LV190 | 2017-07-14 08:17:06 | 2017-07-14 10:17:06 | 1.00E-09 | 3.00E-06 | 3.3731  |
| LV191 | 2017-07-14 10:17:05 | 2017-07-14 18:17:05 | 1.00E-09 | 6.00E-06 | 13.6913 |
| LV193 | 2017-07-15 02:17:05 | 2017-07-15 10:17:05 | 1.00E-09 | 3.00E-06 | 13.3896 |
| LV194 | 2017-07-15 10:17:06 | 2017-07-15 18:17:06 | 1.00E-09 | 6.00E-06 | 13.513  |
| LV195 | 2017-07-15 18:17:06 | 2017-07-16 02:17:06 | 1.00E-09 | 3.00E-06 | 13.6538 |
| LV196 | 2017-07-16 02:17:06 | 2017-07-16 10:17:06 | 1.00E-09 | 3.00E-06 | 13.5267 |
| LV197 | 2017-07-16 10:17:05 | 2017-07-16 18:17:05 | 1.00E-09 | 6.00E-06 | 13.5701 |
| LV198 | 2017-07-16 18:17:06 | 2017-07-17 02:17:06 | 1.00E-09 | 3.00E-06 | 13.5233 |
| LV199 | 2017-07-17 02:17:05 | 2017-07-17 10:17:05 | 1.00E-09 | 3.00E-06 | 13.5925 |

---

## S5 Sample list of seawater samples

Table S2: Information on the seawater samples including sample ID, sample collection date and time, latitude and longitude, the environment the sample was taken from, and the freezing point depression the INP measurements were corrected for.

| Sample ID | Sample Date/Time    | Latitude     | Longitude     | Environment    | freezing point depression (°C) |
|-----------|---------------------|--------------|---------------|----------------|--------------------------------|
| BulkS1    | 2017-05-25 11:00:00 | 57° 17.28'N  | 005° 12.75'E  | ice-free ocean | -2                             |
| SMLS1     | 2017-05-25 11:00:00 | 57° 17.28'N  | 005° 12.75'E  | ice-free ocean | -2.1                           |
| BulkS2    | 2017-05-26 11:00:00 | 61° 06.6'N   | 003° 17.97'E  | ice-free ocean | -2                             |
| SMLS2     | 2017-05-26 11:00:00 | 61° 06.6'N   | 003° 17.97'E  | ice-free ocean | -2.1                           |
| Bulk1     | 2017-05-27 09:00:00 | 64° 41.19'N  | 002° 44.55'E  | ice-free ocean | -2.2                           |
| SML1      | 2017-05-27 09:00:00 | 64° 41.19'N  | 002° 44.55'E  | ice-free ocean | -2.2                           |
| Bulk2     | 2017-05-29 08:30:00 | 72° 24.72'N  | 005° 35.69'E  | ice-free ocean | -2                             |
| SML2      | 2017-05-29 08:30:00 | 72° 24.72'N  | 005° 35.69'E  | ice-free ocean | -2.2                           |
| Bulk3     | 2017-05-31 08:20:00 | 79° 19.16'N  | 008° 24.6'E   | ice-free ocean | -2.1                           |
| SML3      | 2017-05-31 08:20:00 | 79° 19.16'N  | 008° 24.6'E   | ice-free ocean | -2.1                           |
| Bulk4     | 2017-06-01 10:30:00 | 80° 25.55'N  | 007° 15.88'E  | ice pack       | -2                             |
| SML4      | 2017-06-01 10:30:00 | 80° 25.55'N  | 007° 15.88'E  | ice pack       | -2.1                           |
| Bulk5     | 2017-06-02 12:00:00 | 81° 17.39'N  | 009° 17.82'E  | ice pack       | -2                             |
| SML5      | 2017-06-02 12:00:00 | 81° 17.39'N  | 009° 17.82'E  | ice pack       | -2.1                           |
| Bulk6     | 2017-06-04 17:00:00 | 81° 57.0'N   | 010° 30.0'E   | ice pack       | -2.1                           |
| SML6      | 2017-06-04 17:00:00 | 81° 57.0'N   | 010° 30.0'E   | ice pack       | -2.1                           |
| Bulk7     | 2017-06-07 08:00:00 | 81° 56.205'N | 010° 15.057'E | ice pack       | -2                             |
| SML7      | 2017-06-07 08:00:00 | 81° 56.205'N | 010° 15.057'E | ice pack       | -2.1                           |
| Bulk8     | 2017-06-08 12:00:00 | 81° 53.94' N | 009° 51.46' E | ice pack       | -2                             |
| SML8      | 2017-06-08 12:00:00 | 81° 53.94' N | 009° 51.46' E | ice pack       | -2                             |
| BulkS3    | 2017-06-09 08:00:00 | 82° 54.50'N  | 010° 00.74'E  | ice pack       | -2                             |
| SMLS3     | 2017-06-09 08:00:00 | 82° 54.50'N  | 010° 00.74'E  | ice pack       | -2.1                           |
| Bulk9     | 2017-06-10 15:00:00 | 81° 52.32'N  | 010° 27.59'E  | melt pond      | -1.2                           |
| SML9      | 2017-06-10 15:00:00 | 81° 52.32'N  | 010° 27.59'E  | melt pond      | -0.8                           |
| Bulk10    | 2017-06-11 14:00:00 | 81° 49.69'N  | 011° 12.45'E  | ice pack       | -2.1                           |
| SML10     | 2017-06-11 14:00:00 | 81° 49.69'N  | 011° 12.45'E  | ice pack       | -2.1                           |
| Bulk11    | 2017-06-14 13:00:00 | 81° 45.87'N  | 011° 07.09'E  | melt pond      | -1.1                           |
| SML11     | 2017-06-14 13:00:00 | 81° 45.87'N  | 011° 07.09'E  | melt pond      | -1                             |
| Bulk12    | 2017-06-15 11:30:00 | 81° 43.33'N  | 010° 49.11' E | melt pond      | -0.8                           |

**Table S2 continued from previous page**

|        |                     |              |               |                   |      |
|--------|---------------------|--------------|---------------|-------------------|------|
| SML12  | 2017-06-15 11:30:00 | 81° 43.33' N | 010° 49.11' E | melt pond         | -0.8 |
| Bulk13 | 2017-06-17 12:30:00 | 80° 59.59' N | 010° 21.70' E | ice pack          | -2.1 |
| SML13  | 2017-06-17 12:30:00 | 80° 59.59' N | 010° 21.70' E | ice pack          | -2.1 |
| Bulk14 | 2017-06-18 11:00:00 | 80° 08.82' N | 010° 25.68' E | marginal ice zone | -2.1 |
| SML14  | 2017-06-18 11:00:00 | 80° 08.82' N | 010° 25.68' E | marginal ice zone | -2.1 |
| Bulk15 | 2017-06-19 14:00:00 | 78° 39.50' N | 004° 33.23' E | marginal ice zone | -2   |
| SML15  | 2017-06-19 14:00:00 | 78° 39.50' N | 004° 33.23' E | marginal ice zone | -1.6 |
| Bulk16 | 2017-06-24 10:00:00 | 76° 10.62' N | 019° 58.16' E | ice-free ocean    | -1.9 |
| SML16  | 2017-06-24 10:00:00 | 76° 10.62' N | 019° 58.16' E | ice-free ocean    | -2.1 |
| Bulk17 | 2017-06-25 10:45:00 | 77° 54.19' N | 030° 05.20' E | marginal ice zone | -2   |
| SML17  | 2017-06-25 10:45:00 | 77° 54.19' N | 030° 05.20' E | marginal ice zone | -1.9 |
| Bulk18 | 2017-06-25 19:00:00 | 78° 05.40' N | 030° 27.58' E | melt pond         | -0.6 |
| SML18  | 2017-06-25 19:00:00 | 78° 05.40' N | 030° 27.58' E | melt pond         | -0.5 |
| Bulk19 | 2017-06-25 21:50:00 | 78° 05.40' N | 030° 27.58' E | melt pond         | -1.9 |
| SML19  | 2017-06-25 21:50:00 | 78° 05.40' N | 030° 27.58' E | melt pond         | -0.3 |
| Bulk20 | 2017-06-26 10:30:00 | 78° 33.33' N | 033° 57.9' E  | marginal ice zone | -1.9 |
| SML20  | 2017-06-26 10:30:00 | 78° 33.33' N | 033° 57.9' E  | marginal ice zone | -2   |
| Bulk21 | 2017-06-27 13:00:00 | 79° 50.11' N | 034° 02.4' E  | ice pack          | -2   |
| SML21  | 2017-06-27 13:00:00 | 79° 50.11' N | 034° 02.4' E  | ice pack          | -2   |
| Bulk22 | 2017-06-28 23:30:00 | 80° 32.01' N | 030° 58.15' E | melt pond         | -0.4 |
| SML22  | 2017-06-28 23:30:00 | 80° 32.01' N | 030° 58.15' E | melt pond         | -0.3 |
| Bulk23 | 2017-06-29 11:00:00 | 80° 39.93' N | 031° 40.74' E | ice pack          | -2   |
| SML23  | 2017-06-29 11:00:00 | 80° 39.93' N | 031° 40.74' E | ice pack          | -2.1 |
| Bulk24 | 2017-06-30 11:45:00 | 81° 41.73' N | 032° 55.28' E | ice pack          | -2   |
| SML24  | 2017-06-30 11:45:00 | 81° 41.73' N | 032° 55.28' E | ice pack          | -2   |
| Bulk25 | 2017-07-01 16:10:00 | 81° 25.39' N | 032° 34.6' E  | ice pack          | -2.1 |
| SML25  | 2017-07-01 16:10:00 | 81° 25.39' N | 032° 34.6' E  | ice pack          | -2.1 |
| Bulk26 | 2017-07-02 12:45:00 | 81° 39.87' N | 032° 14.67' E | ice pack          | -2   |
| SML26  | 2017-07-02 12:45:00 | 81° 39.87' N | 032° 14.67' E | ice pack          | -2   |
| BulkS4 | 2017-07-02 20:00:00 | 81° 38.99' N | 032° 21.97' E | ice pack          | -2   |
| Bulk27 | 2017-07-03 13:30:00 | 81° 57.92' N | 032° 25.44' E | ice pack          | -2   |
| SML27  | 2017-07-03 13:30:00 | 81° 57.92' N | 032° 25.44' E | ice pack          | -2.1 |
| Bulk28 | 2017-07-05 10:30:00 | 83° 00.3' N  | 033° 11.57' E | ice pack          | -2   |

**Table S2 continued from previous page**

---

|        |                     |             |               |                   |      |
|--------|---------------------|-------------|---------------|-------------------|------|
| SML28  | 2017-07-05 10:30:00 | 83° 00.3'N  | 033°11.57'E   | ice pack          | -2   |
| Bulk29 | 2017-07-06 13:30:00 | 83° 30.02'N | 032° 59.1' E  | ice pack          | -2.1 |
| SML29  | 2017-07-06 13:30:00 | 83° 30.02'N | 032° 59.1' E  | ice pack          | -2.1 |
| Bulk30 | 2017-07-06 22:45:00 | 83° 39.68'N | 031° 34.83'E  | ice pack          | -2   |
| SML30  | 2017-07-06 22:45:00 | 83° 39.68'N | 031° 34.83'E  | ice pack          | -2.1 |
| BulkS5 | 2017-07-06 22:45:00 | 83° 39.68'N | 031° 34.83'E  | melt pond         | -1   |
| SMLS5  | 2017-07-06 22:45:00 | 83° 39.68'N | 031° 34.83'E  | melt pond         | -1   |
| Bulk31 | 2017-07-08 10:45:00 | 83° 28.18'N | 027° 54.75'E  | ice pack          | -2.1 |
| SML31  | 2017-07-08 10:45:00 | 83° 28.18'N | 027° 54.75'E  | ice pack          | -2.1 |
| Bulk32 | 2017-07-09 12:45:00 | 82° 58.00'N | 025° 08.30'E  | ice pack          | -2.1 |
| SML32  | 2017-07-09 12:45:00 | 82° 58.00'N | 025° 08.30'E  | ice pack          | -2   |
| Bulk33 | 2017-07-10 10:45:00 | 82° 30.27'N | 018° 36. 77'E | ice pack          | -2   |
| SML33  | 2017-07-10 10:45:00 | 82° 30.27'N | 018° 36. 77'E | ice pack          | -2   |
| Bulk34 | 2017-07-11 10:00:00 | 82° 02.91'N | 017°55.77'E   | ice pack          | -2.1 |
| SML34  | 2017-07-11 10:00:00 | 82° 02.91'N | 017°55.77'E   | ice pack          | -2   |
| Bulk35 | 2017-07-13 11:10:00 | 81° 13.74'N | 018° 44.63'E  | ice pack          | -2   |
| SML35  | 2017-07-13 11:10:00 | 81° 13.74'N | 018° 44.63'E  | ice pack          | -1.9 |
| Bulk36 | 2017-07-14 11:20:00 | 81° 00.92'N | 026° 52.96'E  | ice pack          | -2.1 |
| SML36  | 2017-07-14 11:20:00 | 81° 00.92'N | 026° 52.96'E  | ice pack          | -2   |
| Bulk37 | 2017-07-15 10:50:00 | 79° 27.45'N | 028° 07.14' E | marginal ice zone | -2   |
| SML37  | 2017-07-15 10:50:00 | 79° 27.45'N | 028° 07.14' E | marginal ice zone | -2   |
| SMLS6  | 2017-07-15 10:50:00 | 79° 27.45'N | 028° 07.14' E | marginal ice zone | -2   |

---

## S6 Test for heat-labile INP

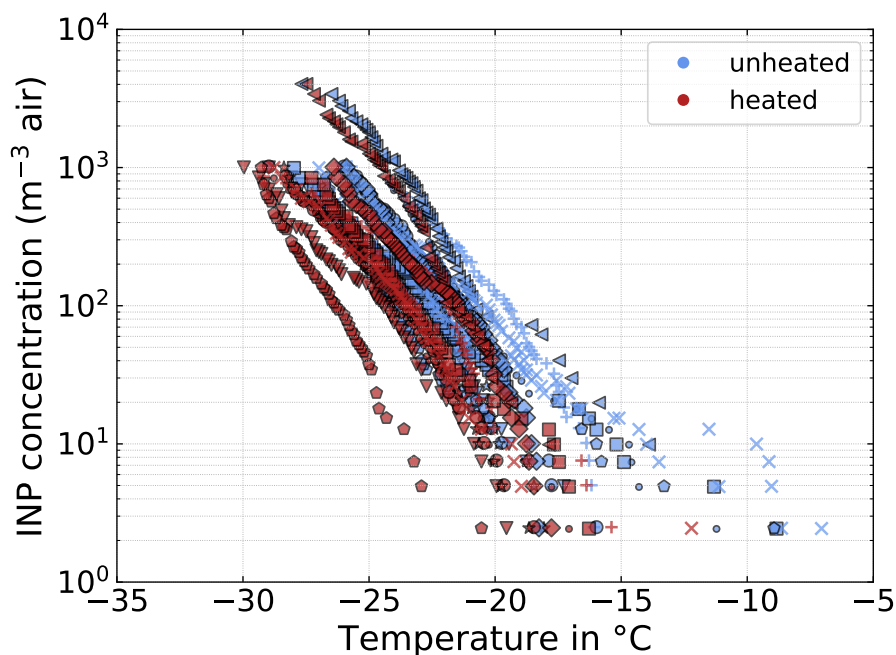

**Figure S6.** Comparison of heated (red symbols) and unheated (blue symbols) filter samples. The same samples have the same symbol.

After the initial measurement arbitrarily selected samples were chosen to test for the presence of heat-labile INPs in the samples. The sample solution was sealed in a centrifuge tube and placed in an oven. The sample was heated at 95°C for 1 h and subsequently analysed with the LINA device. In Fig. S6 it can be seen that the ice activity of all samples was reduced. The strongest reduction occurred with INPs, which were originally active at temperatures above -16°C and are now no longer present after heating. This indicates that these INPs were biogenic and proteinaceous.

Fig S7 shows a box plot of the decrease in  $N_{\text{INP}}$  after the heat treatment at selected temperatures of all samples that were heated. Boxes represent the 25% and 75% quartile. The horizontal line represents the median and the green triangle the mean. The whiskers have the length of 1.5 \* IQR (interquartile range) and data points outside the range of the whiskers is shown with diamond markers. It can be seen that the decrease is most pronounced for the warmer temperatures, but is present throughout the whole temperature range. For temperatures of -16°C and above, the decrease almost always 100%, which indicates that all samples contained heat-labile INP at these temperatures. At temperatures of -18°C and below, the variability in the decrease becomes higher, which indicates that at the lower temperatures some samples still contain mostly heat-labile INP, while in other samples also more heat-stable INP are present.

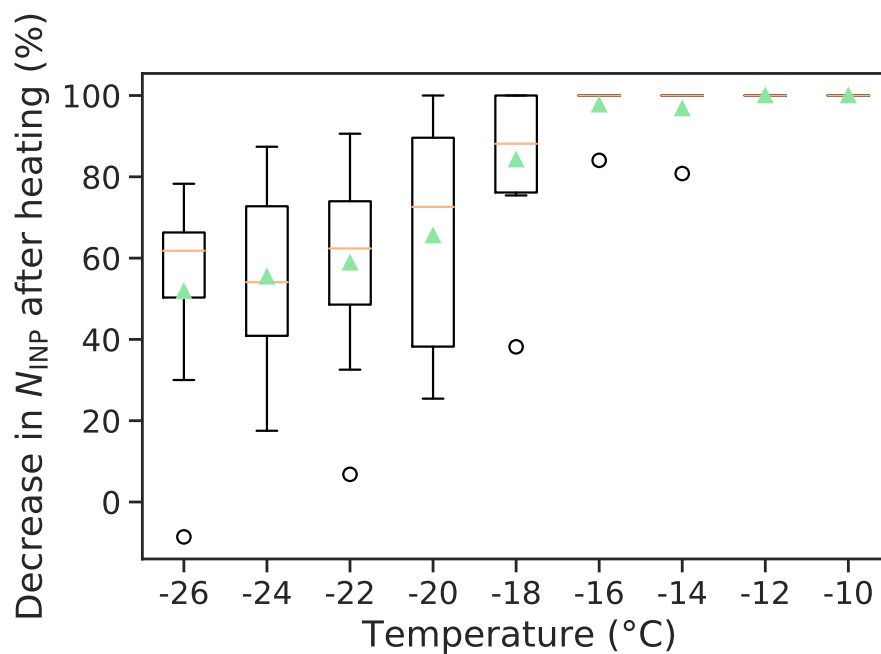

**Figure S7.** Box plot of the decrease in  $N_{\text{INP}}$  after the heat treatment. Boxes represent the 25% and 75% quartile. The horizontal line represents the median and the green triangle the mean. The whiskers have the length of  $1.5 \cdot \text{IQR}$  (interquartile range) and data points outside the range of the whiskers is shown with diamond markers.



## S7 Sample list of fog samples

**Table S3.** Information on the fog samples including sample ID, start and end date/time of sample collection.

| Sample ID | Start Date | Start Time | Stop Date  | Stop Time |
|-----------|------------|------------|------------|-----------|
| WW1       | 2017-05-26 | 04:33:00   | 2017-05-26 | 12:27:00  |
| WW3       | 2017-05-27 | 12:46:00   | 2017-05-27 | 20:39:00  |
| WW4       | 2017-05-27 | 20:56:00   | 2017-05-28 | 06:15:00  |
| WW5       | 2017-06-01 | 13:15:00   | 2017-06-02 | 16:37:00  |
| WW6       | 2017-06-10 | 20:30:00   | 2017-06-13 | 09:58:00  |
| WW7       | 2017-06-23 | 10:00:00   | 2017-06-25 | 10:10:00  |
| WW9       | 2017-06-29 | 10:45:00   | 2017-07-01 | 10:25:00  |
| WW10      | 2017-07-01 | 10:38:00   | 2017-07-06 | 10:30:00  |
| WW11      | 2017-07-06 | 10:45:00   | 2017-07-07 | 11:10:00  |
| WW12      | 2017-07-07 | 11:25:00   | 2017-07-08 | 11:15:00  |
| WW13      | 2017-07-08 | 11:30:00   | 2017-07-08 | 22:20:00  |
| WW15      | 2017-07-09 | 17:00:00   | 2017-07-10 | 11:00:00  |
| WW16      | 2017-07-10 | 11:15:00   | 2017-07-11 | 11:00:00  |
| WW17      | 2017-07-11 | 11:15:00   | 2017-07-14 | 10:25:00  |
| WW18      | 2017-07-14 | 10:38:00   | 2017-07-15 | 10:45:00  |
| WW19      | 2017-07-15 | 10:52:00   | 2017-07-16 | 10:20:00  |
| WW20      | 2017-07-16 | 10:30:00   | 2017-07-16 | 22:15:00  |
| WW21      | 2017-07-16 | 22:30:00   | 2017-07-17 | 10:20:00  |
| WW22      | 2017-07-17 | 10:30:00   | 2017-07-17 | 14:00:00  |

## S8 Freezing spectra of the filter samples

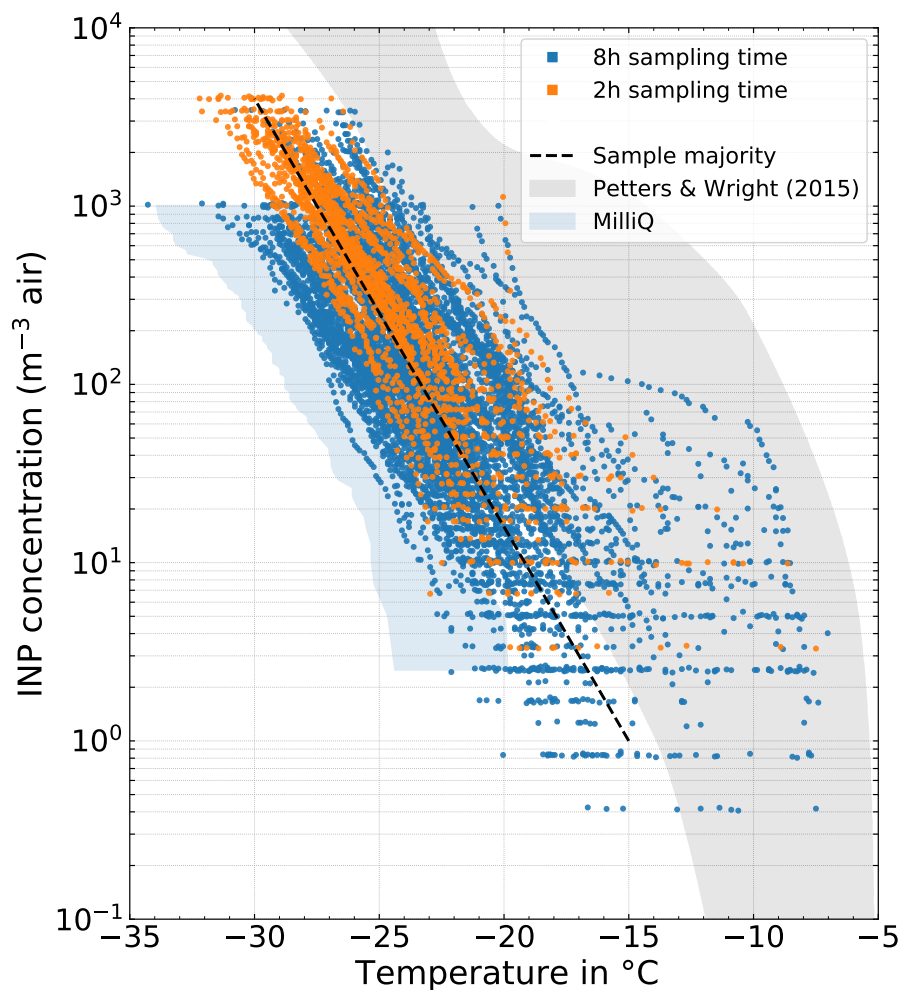

**Figure S8.** All cumulative INP spectra derived from atmospheric filter samples measured with LINA. The color code shows whether it is a sample with 8 h (blue) or 2 h (orange) collection time. The range of  $N_{\text{INP}}$  for mid-latitudes by Petters and Wright (2015) is shown as gray shaded area for reference. The blue area depicts the 10% to 90% percentile range of all pure MilliQ measurements with LINA (scaled to atmospheric concentrations with the average sampled air volume of the 8 h samples).

## S9 Fog derived $N_{\text{INP}}$ for SS=0.02%

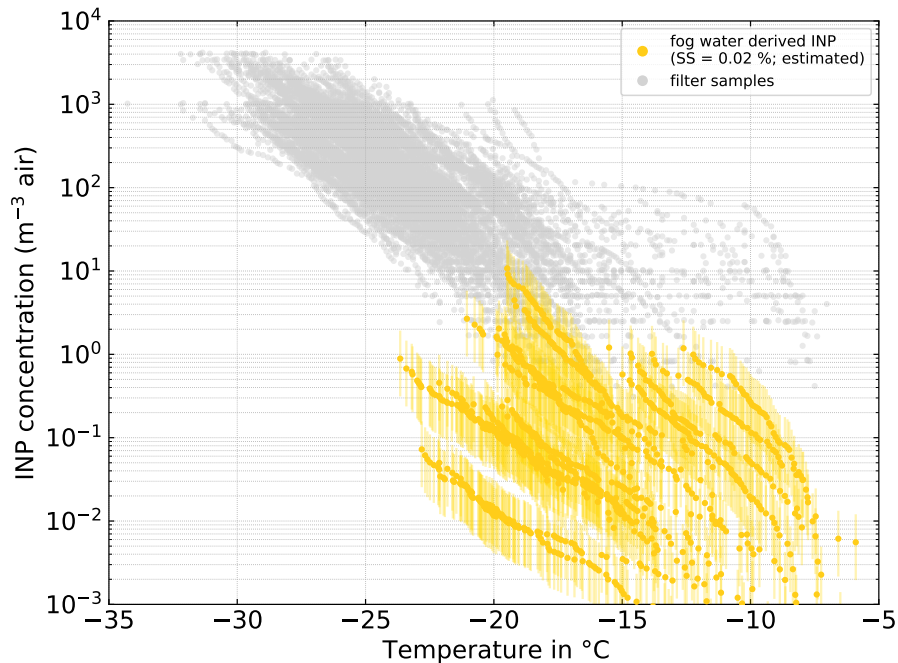

**Figure S9.** Fog water derived  $N_{\text{INP}}$  in air.  $N_{\text{INP}}$  was derived from Eq. 4 and 5 in the main manuscript with the extrapolated  $N_{\text{CCN}}(\text{SS}=0.02\%)$  during the time of each fog sample and an average droplet diameter ( $d_{\text{drop}}$ ) of  $17 \mu\text{m}$ . The error bars show the range with  $d_{\text{drop}}$  of  $12 \mu\text{m}$  and  $22 \mu\text{m}$  respectively.

35 In Fig. S9 the fog water derived  $N_{\text{INP}}$  for an estimated SS of 0.02% is shown. Here, we derived the factor by which the average  $N_{\text{CCN}}$  decreases from 0.3%SS to 0.2%SS. We then use that factor to estimate the decrease in  $N_{\text{CCN}}$  from 0.3%SS to 0.02%SS. With that estimated  $N_{\text{CCN}}$  at 0.02%SS we then again calculate the INP concentration as described in the main manuscript. A linear extrapolation to such low supersaturations has large uncertainties, but gives an estimate for the lower boundary of the presented  $N_{\text{INP}}$  derivation.

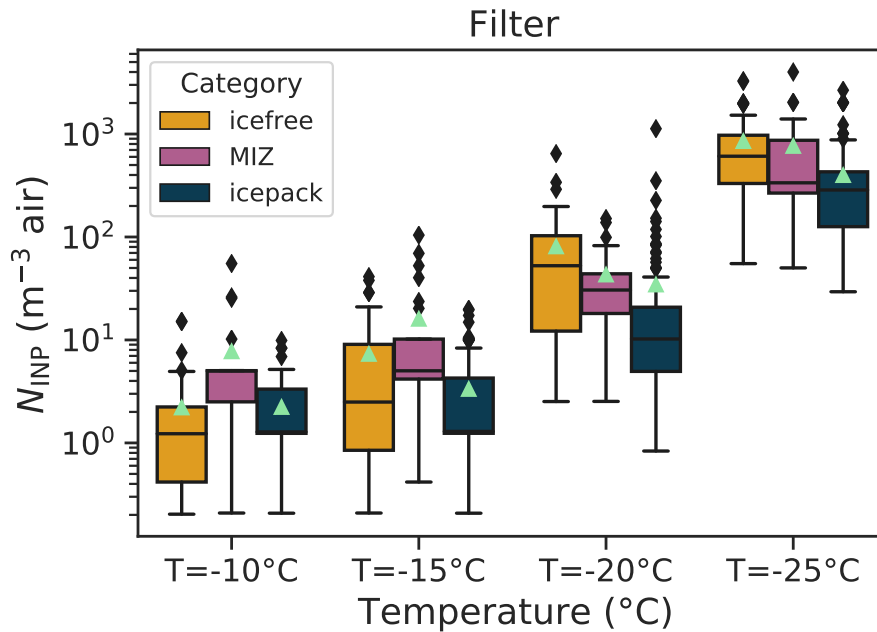

**Figure S10.** Box plot of  $N_{\text{INP}}$  at selected temperatures for the filter samples. The horizontal line represents the median and the green triangle the mean. The whiskers have the length of  $1.5 * \text{IQR}$  and data points outside the range of the whiskers is shown with diamond markers.

Fig. S10 shows a box plot of the filter derived  $N_{\text{INP}}$  shown in Fig. 3 of the main manuscript. The horizontal line represents the median and the green triangle the mean. The whiskers have the length of  $1.5 * \text{IQR}$  and data points outside the range of the whiskers is shown with diamond markers. It should be noted that for samples whose value was outside the detectable range at the selected temperature, the value was substituted in order to minimize the over- and underestimation of the summary statistics needed to create the box plot. If at the selected temperature a sample had an  $N_{\text{INP}}$  value below the detectable range, the value was substituted as  $\text{LLOD}/2$  ( $\text{LLOD} = \text{lower limit of detection}$ ). Analogous values above the detectable range were substituted with  $\text{ULOD}*2$  ( $\text{ULOD} = \text{upper limit of detection}$ ). Box plots for the SML and BSW samples were created in the same manner as described before (Fig. S11 and S12; same data as in Fig. 5 in the main manuscript).

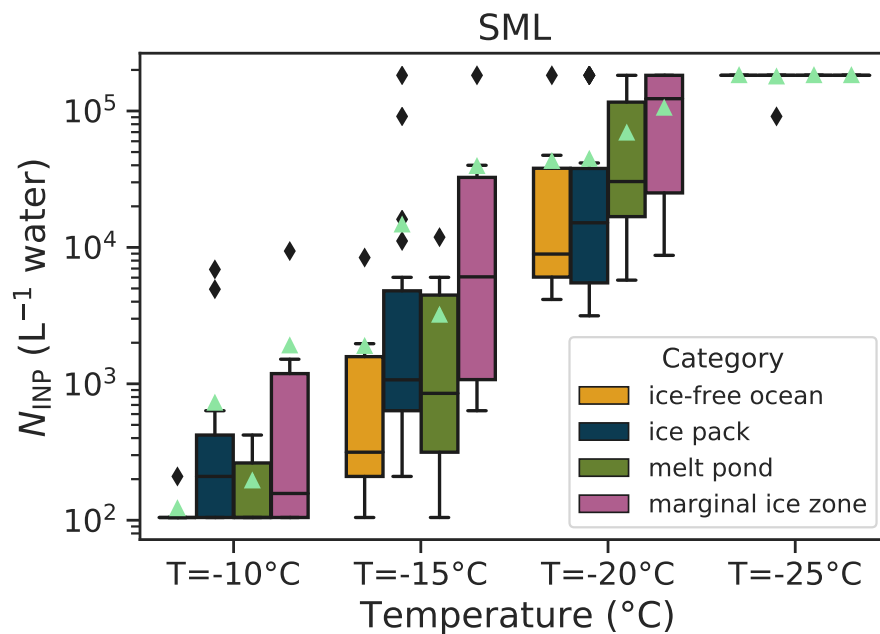

**Figure S11.** Box plot of  $N_{INP}$  at selected temperatures for SML samples. The horizontal line represents the median and the green triangle the mean. The whiskers have the length of  $1.5 * IQR$  and data points outside the range of the whiskers is shown with diamond markers.

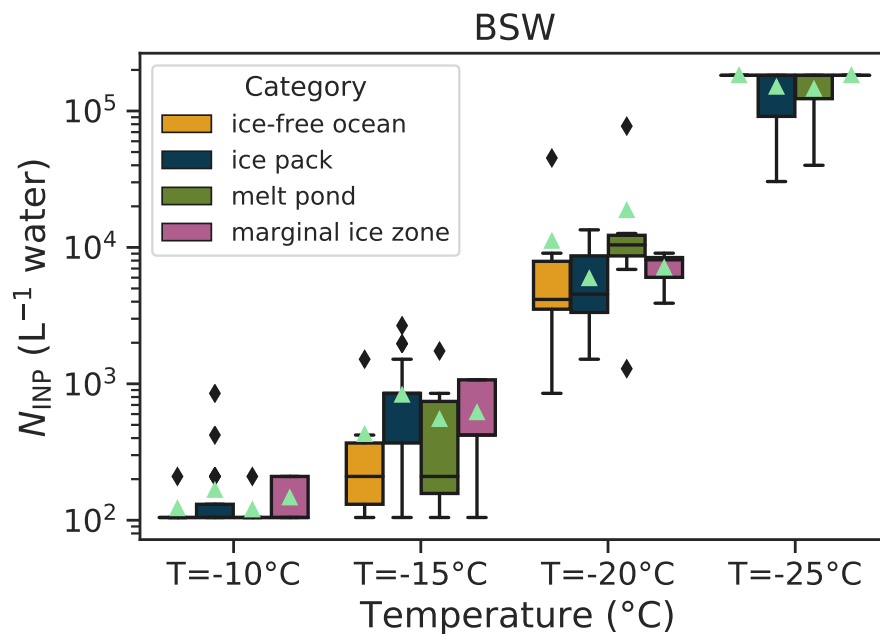

**Figure S12.** Box plot of  $N_{INP}$  at selected temperatures for BSW samples. The horizontal line represents the median and the green triangle the mean. The whiskers have the length of  $1.5 * IQR$  and data points outside the range of the whiskers is shown with diamond markers.

## References

- 50 Petters, M. D. and Wright, T. P.: Revisiting ice nucleation from precipitation samples, *Geophysical Research Letters*, 42, 8758–8766, <https://doi.org/10.1002/2015GL065733>, 2015.
- Schmithüsen, H.: Continuous meteorological surface measurement during POLARSTERN cruise PS106/1 (ARK-XXXI/1.1), <https://doi.org/10.1594/PANGAEA.886302>, <https://doi.org/10.1594/PANGAEA.886302>, 2018.
- Schmithüsen, H.: Continuous meteorological surface measurement during POLARSTERN cruise PS106/2 (ARK-XXXI/1.2),  
55 <https://doi.org/10.1594/PANGAEA.901179>, <https://doi.org/10.1594/PANGAEA.901179>, 2019.
